# Supplementary material for: Exploring the host–guest interactions of small molecules in UoC-9(Ca)
Source: Royal Society of Chemistry journal article supplement (doi:10.1039/d4ce01007h), 2024-01-01
Supplement: d4ce01007h1.pdf [file d4ce01007h1.pdf]

## Supporting Information

### Exploring the Host-Guest Interactions of Small Molecules in UoC-9(Ca)

Sean S. Sebastian,<sup>a</sup> Finn P. Dicke<sup>a</sup> and Uwe Ruschewitz<sup>\*a</sup>

<sup>a</sup> Department of Chemistry and Biochemistry, Institute for Inorganic and Materials Chemistry, University of Cologne, 50939 Cologne, Germany. E-mail: [uwe.ruschewitz@uni-koeln.de](mailto:uwe.ruschewitz@uni-koeln.de)

#### Page 2:

**Table S1.** Details of X-ray Single Crystal Structure Analyses of Hacac@UoC-9, THF@UoC-9 and PhMe@UoC-9.

#### Page 3:

**Table S2.** Details of X-ray Single Crystal Structure Analyses of PC@UoC-9, PhCN@UoC-9 and NMP@UoC-9.

#### Page 4-9:

**Figures S1-S10.** Additional views of the crystal structures.

#### Page 10-12:

**Figures S11-S16.** Digitally generated precession images from the datasets of the different guest@UoC-9 systems.

#### Page 13:

**Figure S17.** Excerpt of the crystal structure of Hacac@UoC-9 with a difference *Fourier* map.

**Figure S18.** 2D slice of the  $F_o$ -map through one unit cell of THF@UoC-9.

**Table S1.** Details of X-ray Single Crystal Structure Analyses of Hacac@UoC-9, THF@UoC-9 and PhMe@UoC-9.

|                                                                                | Hacac@UoC-9                                                                                                                                                  | THF@UoC-9                                                                                                                                     | PhMe@UoC-9                                                                                                                                                                                             |
|--------------------------------------------------------------------------------|--------------------------------------------------------------------------------------------------------------------------------------------------------------|-----------------------------------------------------------------------------------------------------------------------------------------------|--------------------------------------------------------------------------------------------------------------------------------------------------------------------------------------------------------|
| Formula                                                                        | (Ca <sub>5</sub> C <sub>83</sub> H <sub>39</sub> O <sub>23</sub> F <sub>9</sub> )<br>(C <sub>5</sub> O <sub>2</sub> H <sub>8</sub> ) <sub>2</sub> [+solvent] | (Ca <sub>5</sub> C <sub>83</sub> H <sub>39</sub> O <sub>22</sub> F <sub>9</sub> )(C <sub>4</sub> OH <sub>8</sub> ) <sub>3</sub><br>[+solvent] | (Ca <sub>5</sub> C <sub>83</sub> H <sub>39</sub> O <sub>21</sub> F <sub>9</sub> )<br>(C <sub>3</sub> NOH <sub>7</sub> ) <sub>3.97</sub> (C <sub>7</sub> H <sub>8</sub> ) <sub>1.24</sub><br>[+solvent] |
| Formula weight [g/mol]                                                         | 1975.77 (without solvent)                                                                                                                                    | 1975.85 (without solvent)                                                                                                                     | 2148.46 (without solvent)                                                                                                                                                                              |
| Crystal description                                                            | prism, colorless                                                                                                                                             | prism, colorless                                                                                                                              | prism, colorless                                                                                                                                                                                       |
| Crystal size [mm]                                                              | 0.26 · 0.24 · 0.10                                                                                                                                           | 0.17 · 0.12 · 0.08                                                                                                                            | 0.56 · 0.25 · 0.17                                                                                                                                                                                     |
| Space group; Z                                                                 | <i>Ima2</i> (no. 46); 4                                                                                                                                      | <i>Pna2<sub>1</sub></i> (no. 33); 4                                                                                                           | <i>Pna2<sub>1</sub></i> (no. 33); 4                                                                                                                                                                    |
| <i>a</i> [Å]                                                                   | 31.5957(19)                                                                                                                                                  | 31.6409(19)                                                                                                                                   | 31.7465(13)                                                                                                                                                                                            |
| <i>b</i> [Å]                                                                   | 16.8364(9)                                                                                                                                                   | 16.5291(9)                                                                                                                                    | 16.6974(7)                                                                                                                                                                                             |
| <i>c</i> [Å]                                                                   | 28.2441(16)                                                                                                                                                  | 28.7463(15)                                                                                                                                   | 28.4978(11)                                                                                                                                                                                            |
| <i>V</i> [Å <sup>3</sup> ]                                                     | 15024.7(15)                                                                                                                                                  | 15034.2(14)                                                                                                                                   | 15106.2(11)                                                                                                                                                                                            |
| Absorption correction                                                          | SADABS-2016/2<br>(Bruker, 2016/2)                                                                                                                            | SADABS-2016/2<br>(Bruker, 2016/2)                                                                                                             | SADABS-2016/2<br>(Bruker, 2016/2)                                                                                                                                                                      |
| Diffractometer, radiation                                                      | Bruker D8 Venture Dual Beam, Cu Kα                                                                                                                           | Bruker D8 Venture Dual Beam, Mo Kα                                                                                                            | Bruker D8 Venture Dual Beam, Mo Kα                                                                                                                                                                     |
| Temperature [K]                                                                | 100(2)                                                                                                                                                       | 100(2)                                                                                                                                        | 100(2)                                                                                                                                                                                                 |
| 2θ <sub>max</sub> [°]                                                          | 145.382                                                                                                                                                      | 51.362                                                                                                                                        | 50.70                                                                                                                                                                                                  |
|                                                                                | -39 ≤ <i>h</i> ≤ 31                                                                                                                                          | -38 ≤ <i>h</i> ≤ 38                                                                                                                           | -38 ≤ <i>h</i> ≤ 37                                                                                                                                                                                    |
| Index ranges                                                                   | -20 ≤ <i>k</i> ≤ 20                                                                                                                                          | -20 ≤ <i>k</i> ≤ 20                                                                                                                           | -20 ≤ <i>k</i> ≤ 20                                                                                                                                                                                    |
|                                                                                | -34 ≤ <i>l</i> ≤ 34                                                                                                                                          | -30 ≤ <i>l</i> ≤ 35                                                                                                                           | -34 ≤ <i>l</i> ≤ 33                                                                                                                                                                                    |
| Reflections collected / independent                                            | 190537 / 15105                                                                                                                                               | 158745 / 27394                                                                                                                                | 161459 / 27268                                                                                                                                                                                         |
| Significant reflections                                                        | 13825 with <i>I</i> > 2σ( <i>I</i> )                                                                                                                         | 22297 with <i>I</i> > 2σ( <i>I</i> )                                                                                                          | 23583 with <i>I</i> > 2σ( <i>I</i> )                                                                                                                                                                   |
| R <sub>int</sub>                                                               | 0.1253                                                                                                                                                       | 0.0566                                                                                                                                        | 0.0484                                                                                                                                                                                                 |
| Data / parameters / restraints                                                 | 15105 / 820 / 319                                                                                                                                            | 27394 / 1532 / 1430                                                                                                                           | 27268 / 1746 / 1499                                                                                                                                                                                    |
| GooF = S <sub>all</sub>                                                        | 1.040                                                                                                                                                        | 1.039                                                                                                                                         | 1.024                                                                                                                                                                                                  |
| R [ <i>F</i> <sup>2</sup> > 2σ( <i>F</i> <sup>2</sup> )]                       | 0.0608                                                                                                                                                       | 0.0739                                                                                                                                        | 0.0726                                                                                                                                                                                                 |
| wR( <i>F</i> <sup>2</sup> ), all data                                          | 0.1658                                                                                                                                                       | 0.2144                                                                                                                                        | 0.2096                                                                                                                                                                                                 |
| Solvent accessible volume, electrons found in s.a.v. (SQUEEZE)                 | 7189 Å <sup>3</sup> , 2568                                                                                                                                   | 7482 Å <sup>3</sup> , 1777                                                                                                                    | 5434 Å <sup>3</sup> , 1206                                                                                                                                                                             |
| Δρ <sub>min</sub> / Δρ <sub>max</sub> [e · 10 <sup>-6</sup> pm <sup>-3</sup> ] | -0.381 / 0.312                                                                                                                                               | -0.454 / 0.795                                                                                                                                | -0.681 / 0.655                                                                                                                                                                                         |
| Flack( <i>x</i> )                                                              | 0.121(11) (refined as inversion twin)                                                                                                                        | 0.23(4) (refined as inversion twin)                                                                                                           | 0.15(4) (refined as inversion twin)                                                                                                                                                                    |
| CCDC deposition number                                                         | CCDC-2383895                                                                                                                                                 | CCDC-2383896                                                                                                                                  | CCDC-2383897                                                                                                                                                                                           |

**Table S2.** Details of X-ray Single Crystal Structure Analyses of PC@UoC-9, PhCN@UoC-9 and NMP@UoC-9.

|                                                                                  | PC@UoC-9                                                                                                                                                    | PhCN@UoC-9                                                                                                                                                                                           | NMP@UoC-9                                                                                                                                          |
|----------------------------------------------------------------------------------|-------------------------------------------------------------------------------------------------------------------------------------------------------------|------------------------------------------------------------------------------------------------------------------------------------------------------------------------------------------------------|----------------------------------------------------------------------------------------------------------------------------------------------------|
| Formula                                                                          | (Ca <sub>5</sub> C <sub>83</sub> H <sub>39</sub> O <sub>21</sub> F <sub>9</sub> )(C <sub>4</sub> O <sub>3</sub> H <sub>6</sub> ) <sub>5</sub><br>[+solvent] | (Ca <sub>5</sub> C <sub>83</sub> H <sub>39</sub> O <sub>21</sub> F <sub>9</sub> )<br>(C <sub>3</sub> NOH <sub>7</sub> ) <sub>4</sub> (C <sub>7</sub> NH <sub>5</sub> ) <sub>3.25</sub><br>[+solvent] | (Ca <sub>5</sub> C <sub>83</sub> H <sub>39</sub> O <sub>20</sub> F <sub>9</sub> )<br>(C <sub>5</sub> H <sub>9</sub> NO) <sub>5.77</sub> [+solvent] |
| Formula weight [g/mol]                                                           | 2253.98 (without solvent)                                                                                                                                   | 2371.26 (without solvent)                                                                                                                                                                            | 2298.26 (without solvent)                                                                                                                          |
| Crystal description                                                              | prism, colorless                                                                                                                                            | prism, colorless                                                                                                                                                                                     | prism, colorless                                                                                                                                   |
| Crystal size [mm]                                                                | 0.30 · 0.18 · 0.06                                                                                                                                          | 0.25 · 0.25 · 0.10                                                                                                                                                                                   | 0.18 · 0.14 · 0.10                                                                                                                                 |
| Space group; Z                                                                   | <i>Pna</i> 2 <sub>1</sub> (no. 33); 4                                                                                                                       | <i>Ima</i> 2 (no. 46); 4                                                                                                                                                                             | <i>Pna</i> 2 <sub>1</sub> (no. 33); 12                                                                                                             |
| <i>a</i> [Å]                                                                     | 31.6786(8)                                                                                                                                                  | 31.8875(14)                                                                                                                                                                                          | 32.033(6)                                                                                                                                          |
| <i>b</i> [Å]                                                                     | 16.5991(5)                                                                                                                                                  | 16.6009(7)                                                                                                                                                                                           | 49.659(10)                                                                                                                                         |
| <i>c</i> [Å]                                                                     | 28.8107(8)                                                                                                                                                  | 28.7479(11)                                                                                                                                                                                          | 28.956(6)                                                                                                                                          |
| <i>V</i> [Å <sup>3</sup> ]                                                       | 15149.7(7)                                                                                                                                                  | 15218.0(11)                                                                                                                                                                                          | 46062(16)                                                                                                                                          |
| Absorption correction                                                            | SADABS-2016/2<br>(Bruker, 2016/2)                                                                                                                           | SADABS-2016/2<br>(Bruker, 2016/2)                                                                                                                                                                    | CrysAlisPro 1.171.41.112a<br>(Rigaku Oxford Diffraction,<br>2021)                                                                                  |
| Diffractometer, radiation                                                        | Bruker D8 Venture Dual<br>Beam, Mo K $\alpha$                                                                                                               | Bruker D8 Venture Dual<br>Beam, Mo K $\alpha$                                                                                                                                                        | Beamline P24 @ DESY,<br>0.500000 Å                                                                                                                 |
| Temperature [K]                                                                  | 100(2)                                                                                                                                                      | 100(2)                                                                                                                                                                                               | 100(2)                                                                                                                                             |
| $2\theta_{\max}$ [°]                                                             | 52.748                                                                                                                                                      | 52.798                                                                                                                                                                                               | 36.898                                                                                                                                             |
|                                                                                  | -39 ≤ <i>h</i> ≤ 39                                                                                                                                         | -39 ≤ <i>h</i> ≤ 39                                                                                                                                                                                  | -40 ≤ <i>h</i> ≤ 33                                                                                                                                |
| Index ranges                                                                     | -20 ≤ <i>k</i> ≤ 20                                                                                                                                         | -20 ≤ <i>k</i> ≤ 20                                                                                                                                                                                  | -62 ≤ <i>k</i> ≤ 62                                                                                                                                |
|                                                                                  | -35 ≤ <i>l</i> ≤ 35                                                                                                                                         | -35 ≤ <i>l</i> ≤ 35                                                                                                                                                                                  | -26 ≤ <i>l</i> ≤ 36                                                                                                                                |
| Reflections collected / independent                                              | 305303 / 29404                                                                                                                                              | 472470 / 15817                                                                                                                                                                                       | 165206 / 71589                                                                                                                                     |
| Significant reflections                                                          | 25369 with <i>I</i> > 2 $\sigma$ ( <i>I</i> )                                                                                                               | 15349 with <i>I</i> > 2 $\sigma$ ( <i>I</i> )                                                                                                                                                        | 32322 with <i>I</i> > 2 $\sigma$ ( <i>I</i> )                                                                                                      |
| R <sub>int</sub>                                                                 | 0.0673                                                                                                                                                      | 0.0392                                                                                                                                                                                               | 0.0715                                                                                                                                             |
| Data / parameters / restraints                                                   | 29404 / 1550 / 516                                                                                                                                          | 15817 / 907 / 571                                                                                                                                                                                    | 71589 / 4678 / 1507                                                                                                                                |
| GooF = S <sub>all</sub>                                                          | 1.065                                                                                                                                                       | 1.068                                                                                                                                                                                                | 0.956                                                                                                                                              |
| R [ <i>F</i> <sup>2</sup> > 2 $\sigma$ ( <i>F</i> <sup>2</sup> )]                | 0.0623                                                                                                                                                      | 0.0478                                                                                                                                                                                               | 0.0970                                                                                                                                             |
| wR( <i>F</i> <sup>2</sup> ), all data                                            | 0.1913                                                                                                                                                      | 0.1408                                                                                                                                                                                               | 0.3181                                                                                                                                             |
| Solvent accessible volume, electrons found in s.a.v. (SQUEEZE)                   | 6051 Å <sup>3</sup> , 1619                                                                                                                                  | 4386 Å <sup>3</sup> , 1423                                                                                                                                                                           | 16266 Å <sup>3</sup> , 4633                                                                                                                        |
| $\Delta\rho_{\min} / \Delta\rho_{\max}$ [e · 10 <sup>-6</sup> pm <sup>-3</sup> ] | -0.363 / 1.792                                                                                                                                              | -0.328 / 0.727                                                                                                                                                                                       | -0.633 / 1.462                                                                                                                                     |
| Flack( <i>x</i> )                                                                | 0.030(9) (refined as inversion twin)                                                                                                                        | 0.07(3) (refined as inversion twin)                                                                                                                                                                  | 0.20(8) (refined as inversion twin)                                                                                                                |
| CCDC deposition number                                                           | CCDC-2383898                                                                                                                                                | CCDC-2383899                                                                                                                                                                                         | CCDC-2383900                                                                                                                                       |

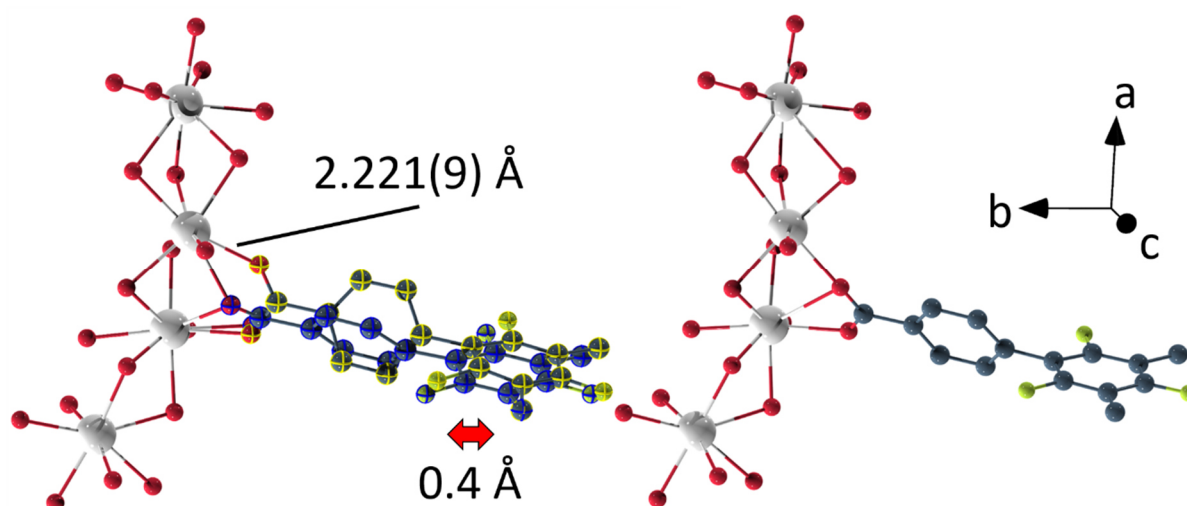

**Figure S1.** Excerpt of the crystal structure of Hacac@UoC-9 (left) showing a fragment of the disordered linker coordinating to the SBU; the two individual disordered linker fragments are highlighted in blue and yellow, respectively. For comparison, an excerpt of the crystal structure of DMF@UoC-9 with an ordered linker fragment is shown (right).

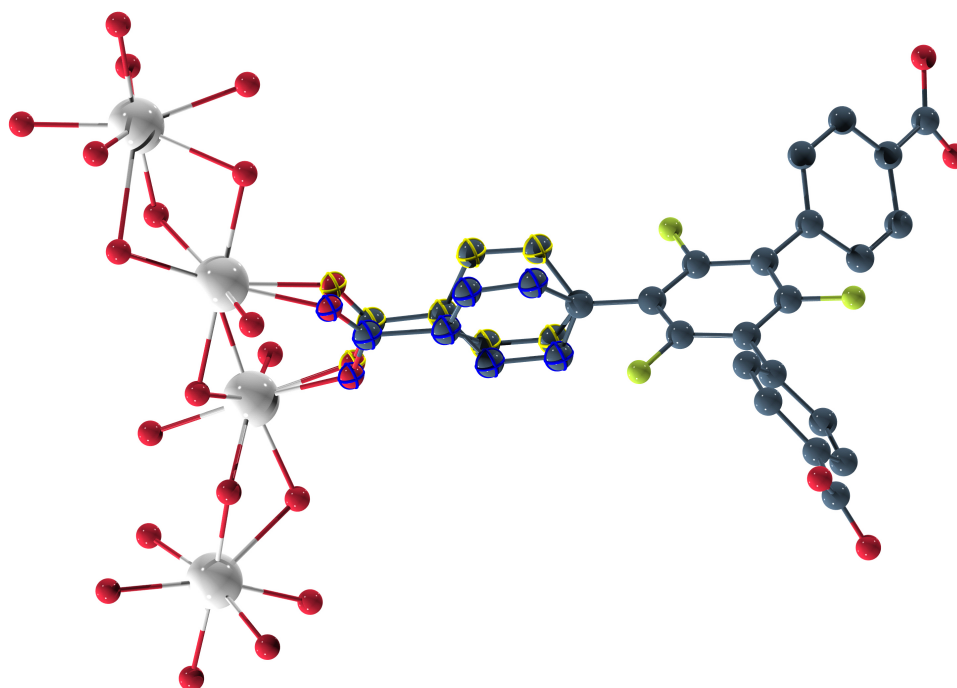

**Figure S2.** Excerpt of the crystal structure of PC@UoC-9 showing a disordered linker coordinating to the SBU. The two individual disordered fragments are highlighted in blue and yellow, respectively.

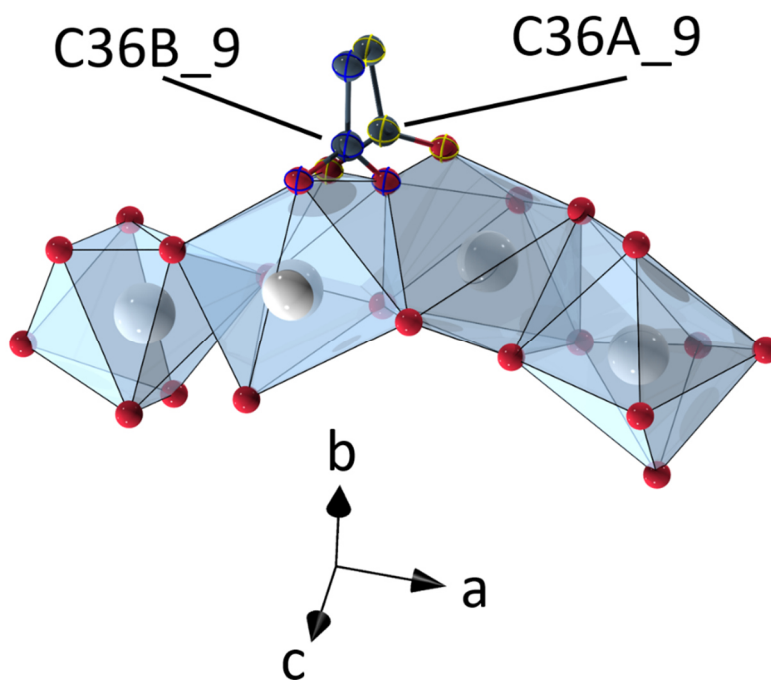

**Figure S3.** Excerpt of the crystal structure of NMP@UoC-9 showing a fragment of the SBU with two coordinating disordered carboxylate groups. The two individual disordered fragments are highlighted in blue and yellow, respectively.

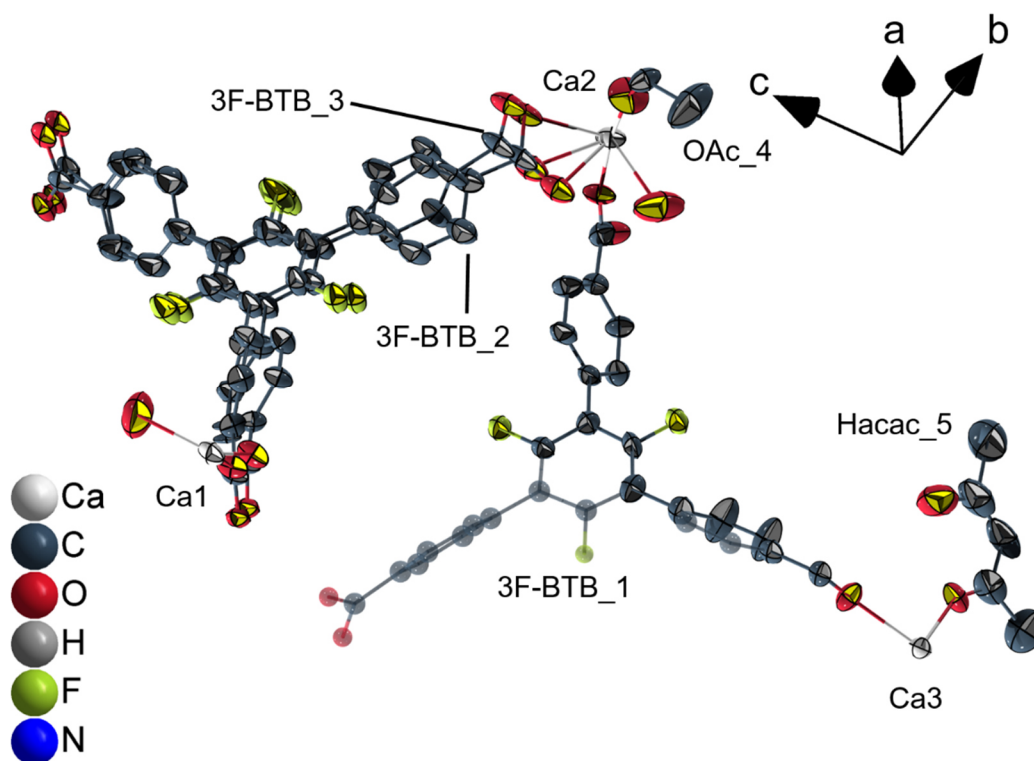

**Figure S4.** Asymmetric unit of Hacac@UoC-9 refined from X-ray single-crystal diffraction data recorded at 100 K and displayed as thermal ellipsoids (50% probability). Molecular entities are labelled according to the refinement. Non-coordinating DMF molecules and hydrogen atoms are omitted for clarity.

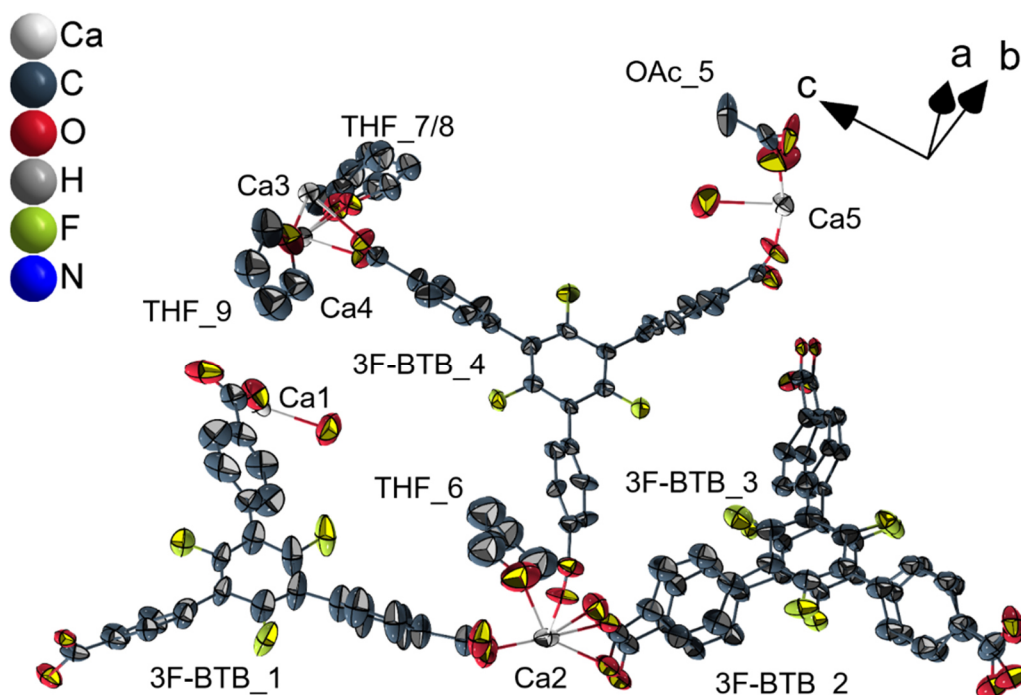

**Figure S5.** Asymmetric unit of THF@UoC-9 refined from X-ray single-crystal diffraction data recorded at 100 K and displayed as thermal ellipsoids (50% probability). Molecular entities are labelled according to the refinement. All moieties being part of the framework are shown in a transparent mode without labels. Hydrogen atoms are omitted for clarity.

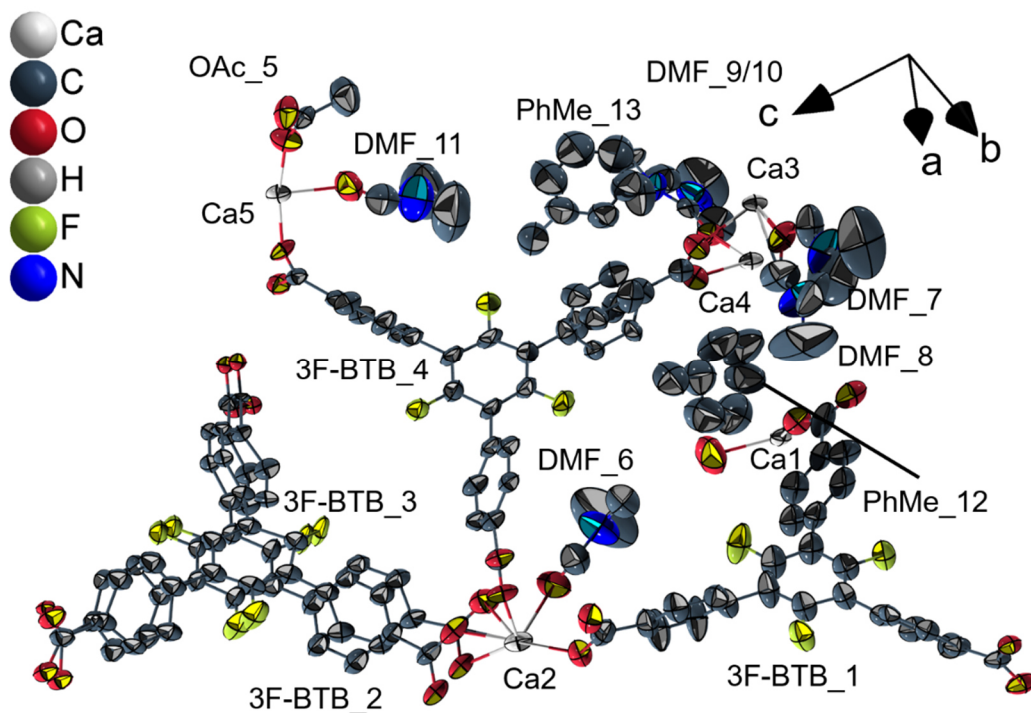

**Figure S6.** Asymmetric unit of PhMe@UoC-9 refined from X-ray single-crystal diffraction data recorded at 100 K and displayed as thermal ellipsoids (50% probability). Molecular entities are labelled according to the refinement. Hydrogen atoms are omitted for clarity.

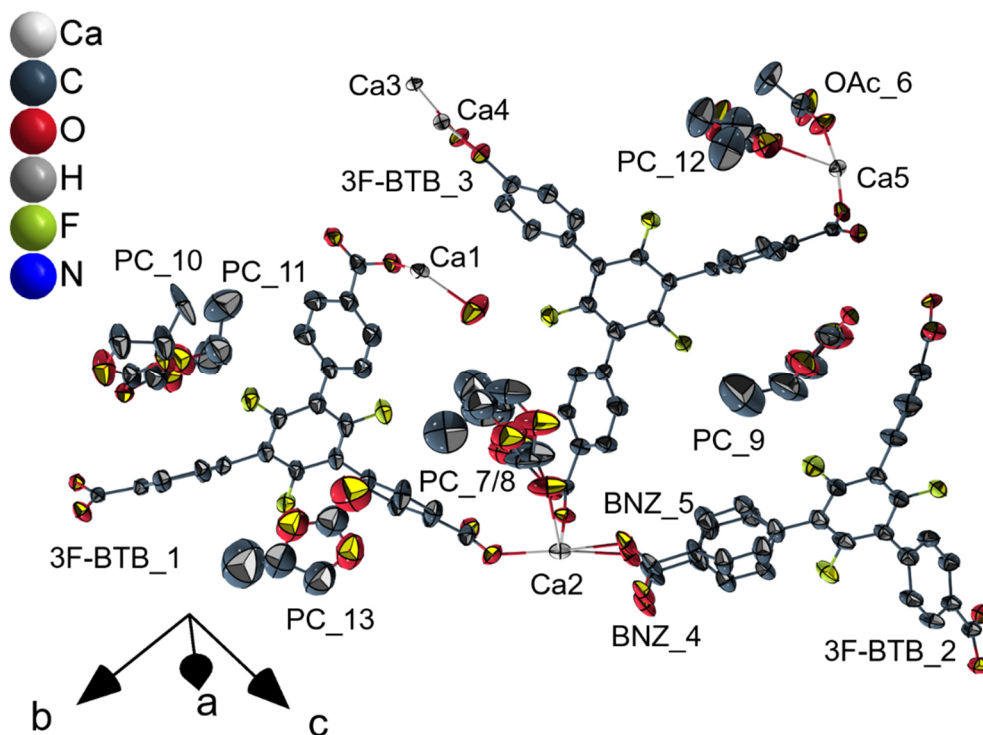

**Figure S7.** Asymmetric unit of PC@UoC-9 refined from X-ray single-crystal diffraction data recorded at 100 K and displayed as thermal ellipsoids (50% probability). Molecular entities are labelled according to the refinement. All moieties being part of the framework are shown in a transparent mode without labels. Hydrogen atoms are omitted for clarity.

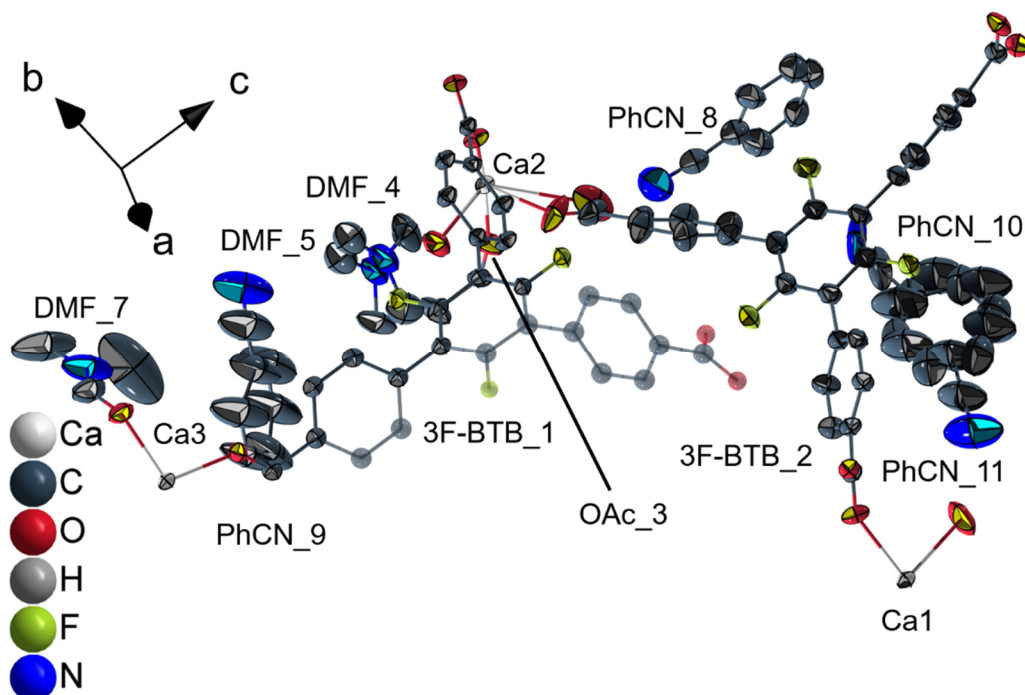

**Figure S8.** Asymmetric unit of PhCN@UoC-9 refined from X-ray single-crystal diffraction data recorded at 100 K and displayed as thermal ellipsoids (50% probability). Molecular entities are labelled according to the refinement. Hydrogen atoms are omitted for clarity.

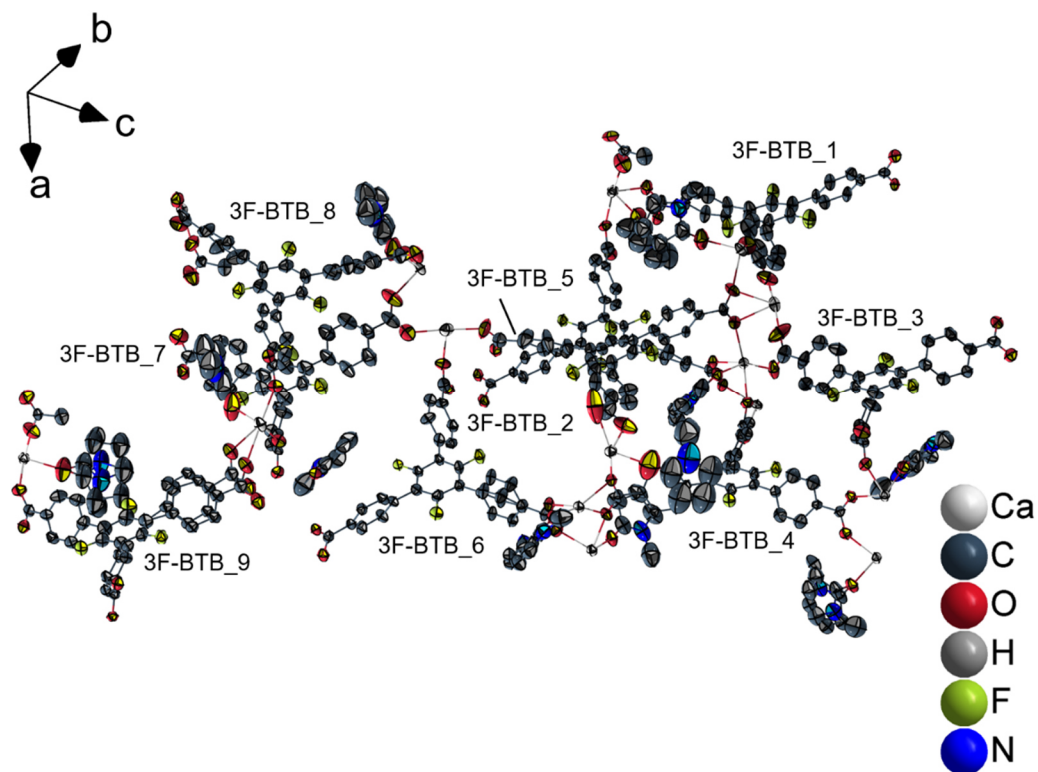

**Figure S9.** Asymmetric unit of NMP@UoC-9 refined from synchrotron single-crystal diffraction data recorded at 100 K and displayed as thermal ellipsoids (50% probability). Molecular entities are labelled according to the refinement. Hydrogen atoms are omitted for clarity.



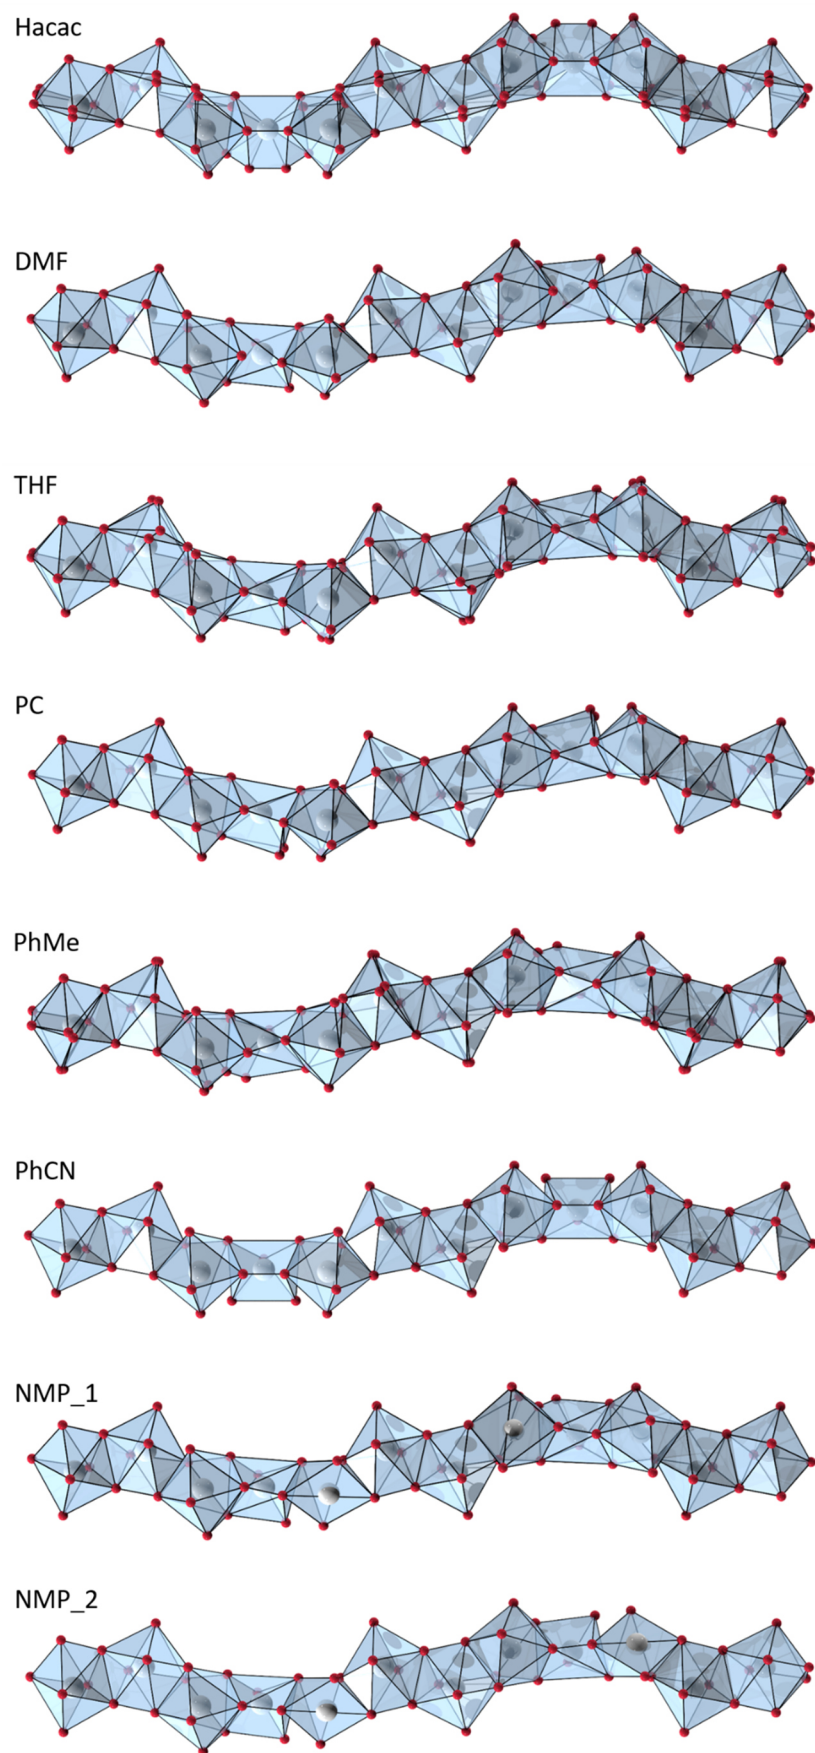

**Figure S10.** Excerpts of the SBUs of all Guest@UoC-9 systems shown along the crystallographic *c*-axis from the shortest (top) to the longest *a*-axis (bottom).

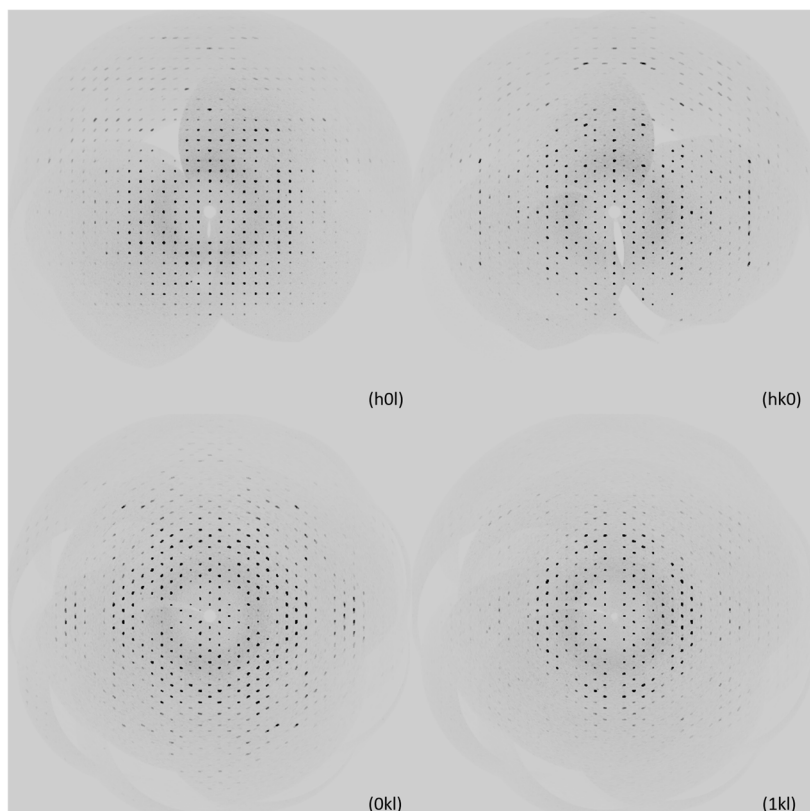

**Figure S11.** Digitally generated precession images of the from left to right, top to bottom (h0l), (hk0), (0kl) and (1kl) layers, from the dataset of the Hacac@UoC-9 system.

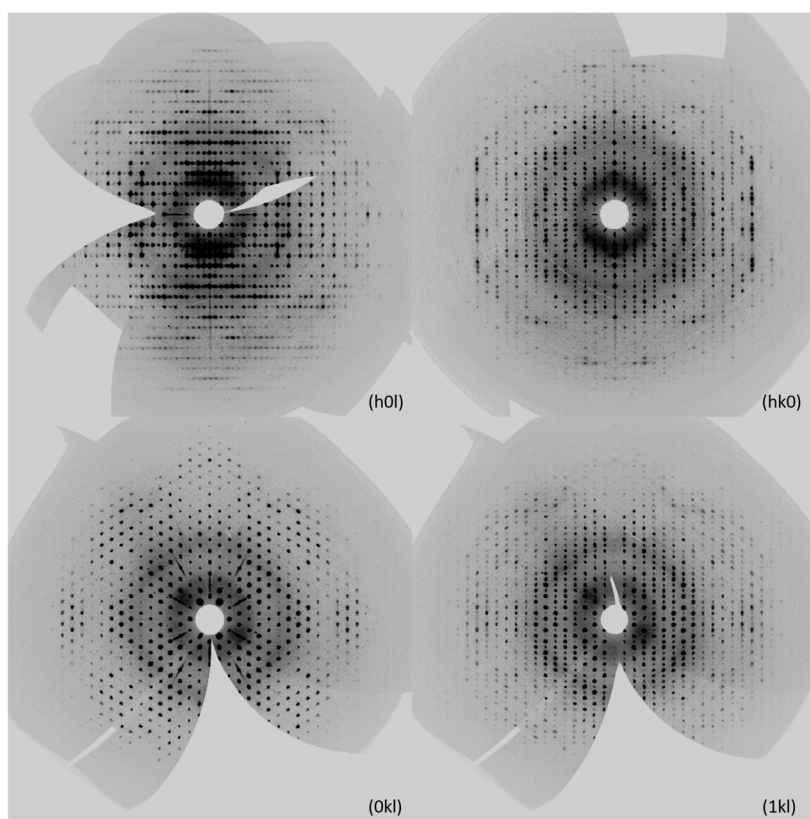

**Figure S12.** Digitally generated precession images of the from left to right, top to bottom (h0l), (hk0), (0kl) and (1kl) layers, from the dataset of the THF@UoC-9 system.

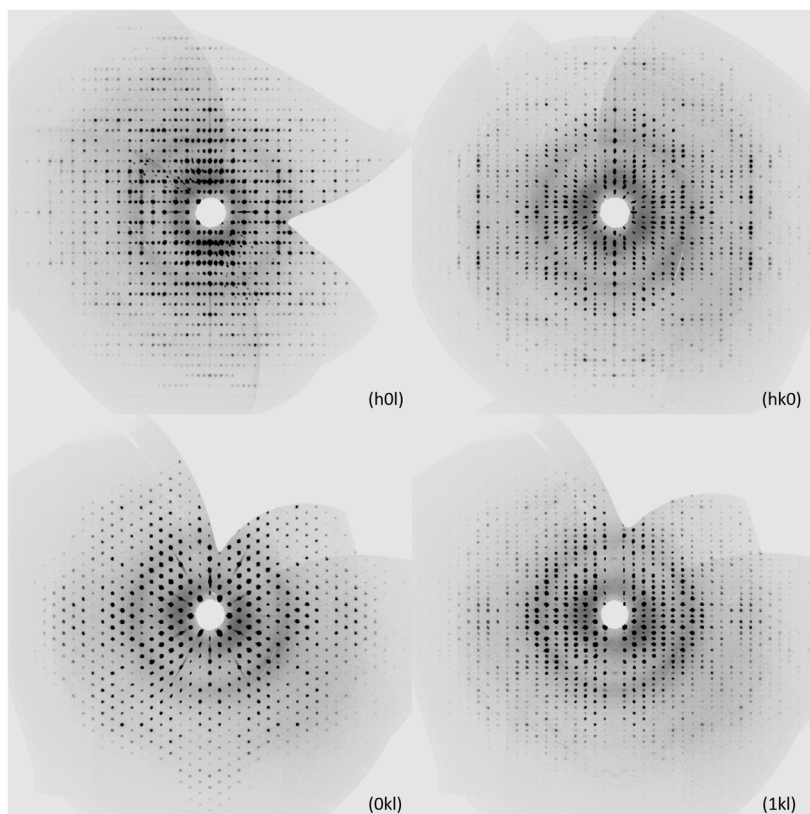

**Figure S13.** Digitally generated precession images of the from left to right, top to bottom (h0l), (hk0), (0kl) and (1kl) layers, from the dataset of the PhMe@UoC-9 system.

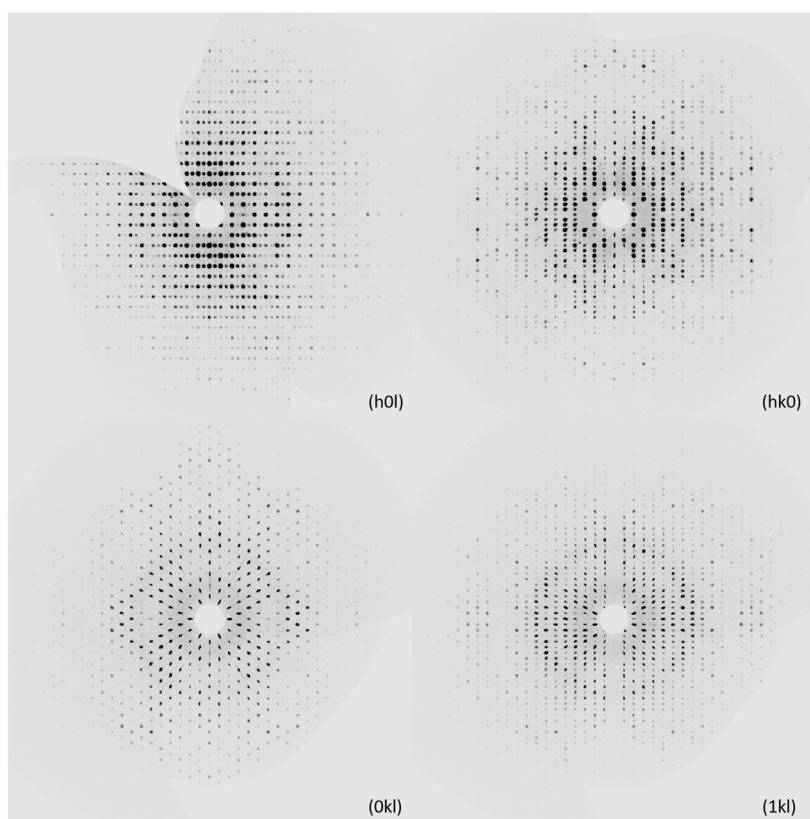

**Figure S14.** Digitally generated precession images of the from left to right, top to bottom (h0l), (hk0), (0kl) and (1kl) layers, from the dataset of the PC@UoC-9 system.

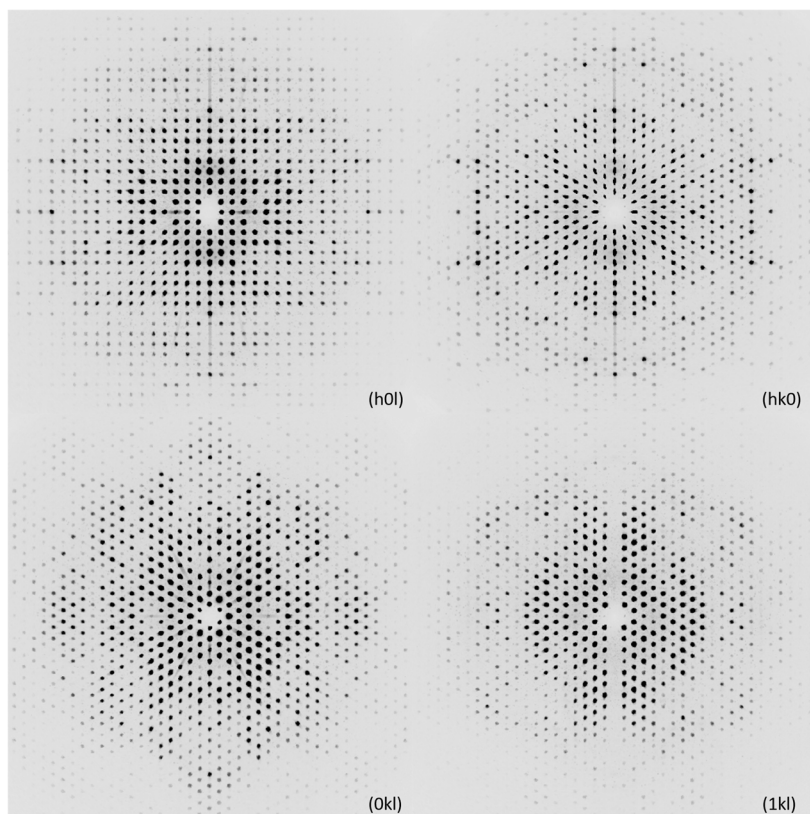

**Figure S15.** Digitally generated precession images of the from left to right, top to bottom (h0l), (hk0), (0kl) and (1kl) layers, from the dataset of the PhCN@UoC-9 system.

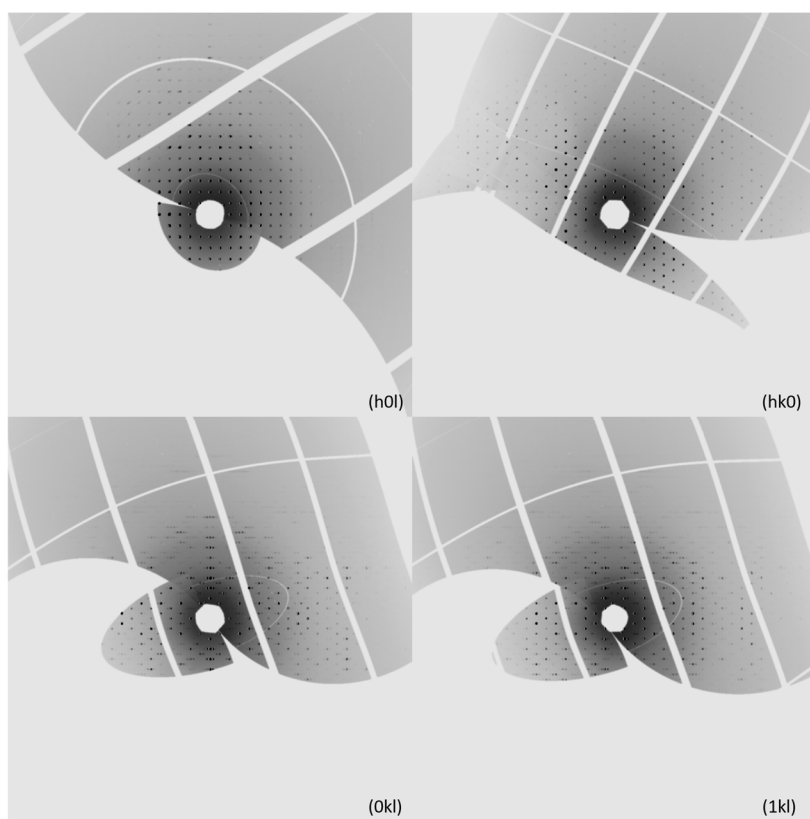

**Figure S16.** Digitally generated precession images of the from left to right, top to bottom (h0l), (hk0), (0kl) and (1kl) layers, from the dataset of the NMP@UoC-9 system.

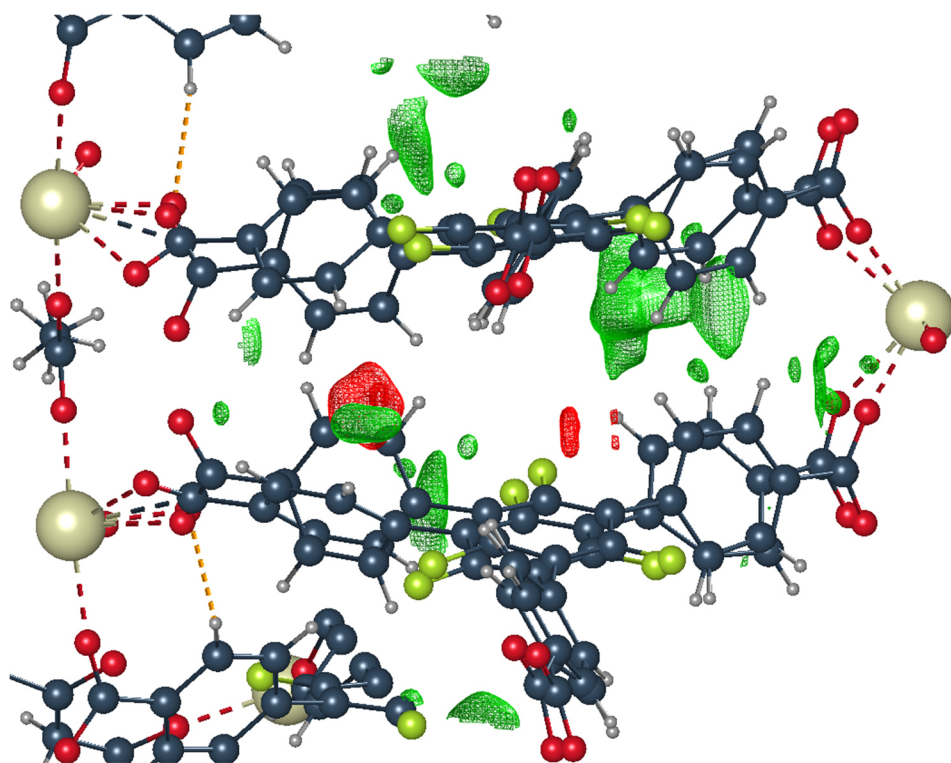

**Figure S17.** Excerpt of the crystal structure of Hacac@UoC-9(Ca) showing the difference *Fourier* map in a 7 Å radius around the one carbon of the central ring in the centre of the figure. Green and red colours correspond to positive and negative electron densities, respectively. The maps are drawn with a threshold of 0.51 e/Å<sup>3</sup>.

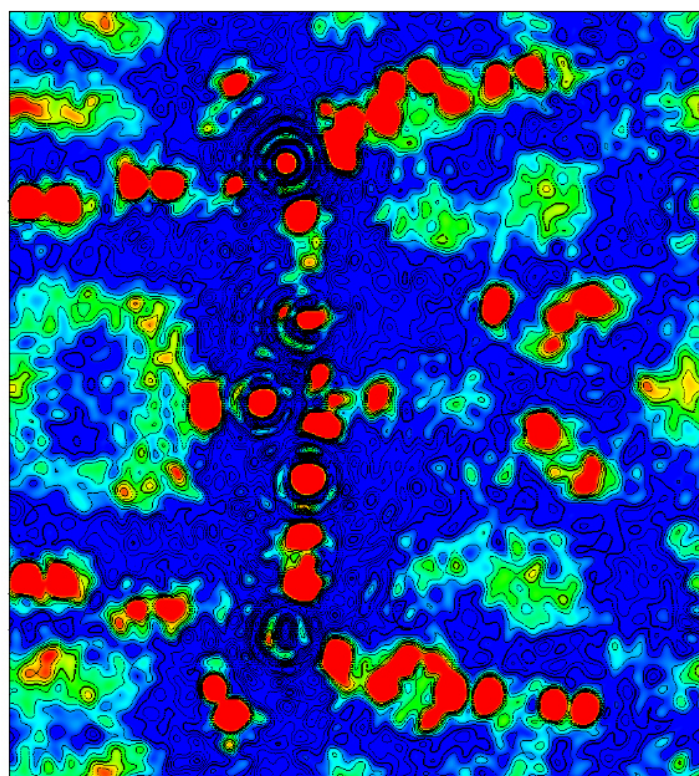

**Figure S18.** 2D slice of the  $F_o$ -map through one unit cell of THF@UoC-9 shown along the crystallographic *b*-axis, offset from the origin: 2.1 Å. The gradient from red to blue corresponds to high and low electron density, respectively.
